# Supplementary material for: Incorporating doped carbon nanodots and metal ions as an excellent artificial peroxidase for H2O2 detection
Source: Royal Society of Chemistry journal article supplement (doi:10.1039/c7ra05146h), 2017-01-01
Supplement: c7ra05146h1.pdf [file c7ra05146h1.pdf]

## Supporting Information

for

Incorporating doped carbon nanodots and metal ion as an excellent  
artificial peroxidase for H<sub>2</sub>O<sub>2</sub> detection

Feng Li, Xian-He Yu, Fen-Ying Kong, Zhong-Xia Wang\* and Wei Wang\*

*School of Chemistry and Chemical Engineering, Yancheng Institute of Technology,  
Yancheng 224051, China.*

**\*Corresponding authors.** Tel. (Fax): (+86) 515-88298186.

E-mail: [wangzx198411@163.com](mailto:wangzx198411@163.com); [wangw@ycit.edu.cn](mailto:wangw@ycit.edu.cn).

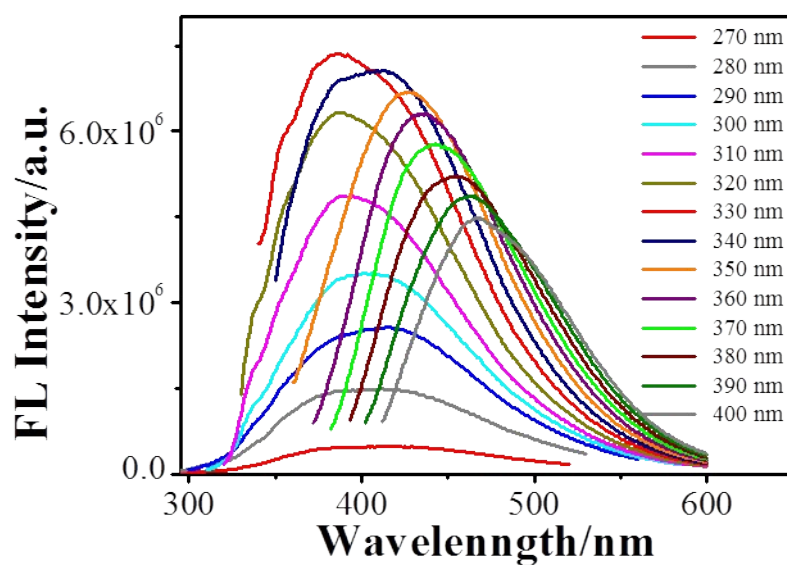

Figure S1 FL spectra of the NCdots at different excitation wavelengths from 270 to 400 nm.

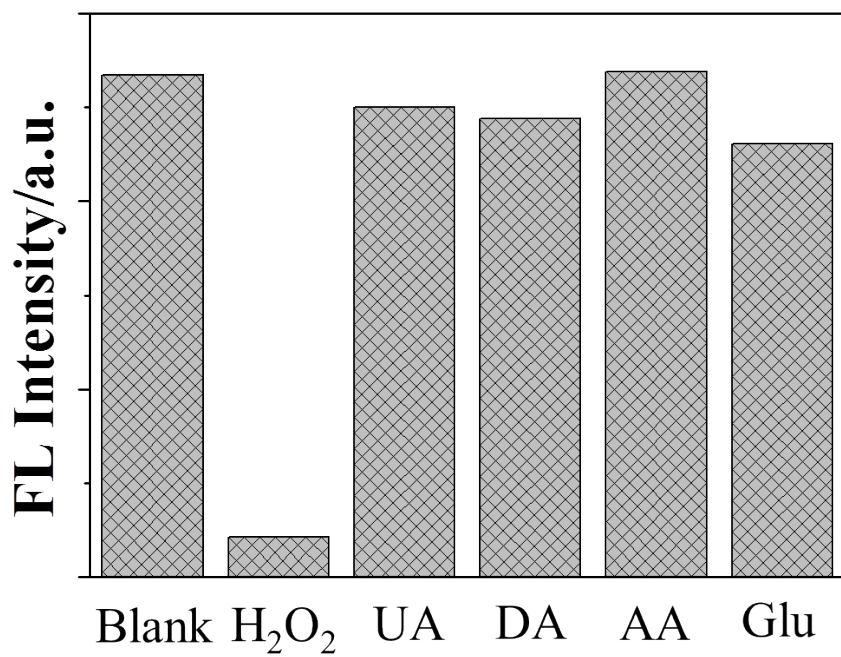

Figure S2 Selectivity of the NCdots-based detection system (RSD, 3.85%, n=5). The concentration of H<sub>2</sub>O<sub>2</sub> is 300 mM, while those of the other substances are 500 mM. The final concentration of the NCdots is 20  $\mu\text{g mL}^{-1}$ .
